## Adiponectin: Stability in Plasma over 36 Hours and Within-Person Variation over 1 Year, Tobias Pischon,<sup>1,2\*</sup>

Gökhan S. Hotamisligil,<sup>1</sup> and Eric B. Rimm<sup>1,3,4</sup> (<sup>1</sup> Department

of Nutrition and Division of Biological Sciences and <sup>3</sup> Department of Epidemiology, Harvard School of Public

Health, Boston, MA 02115; <sup>2</sup> Franz-Volhard-Clinic, Charité, Humboldt-University, 13125 Berlin, Germany;

<sup>4</sup> Channing Laboratory, Department of Medicine, Harvard Medical School and Brigham & Women's Hospital, Boston, MA 02115; \* address correspondence to this author at: Department of Nutrition, Harvard School of Public Health, 665 Huntington Ave., Boston, MA 02115; e-mail tpischon@hsph.harvard.edu)

Adiponectin (Arcp30, AdipoQ, apM1, or GBP28), a novel 247-amino acid peptide, is secreted predominantly by adipocytes and accounts for ~0.05% of total serum proteins (1–4). It is induced early in adipocyte differentiation (1), consists of an N-terminal collagenous and a C-terminal globular domain, and shares homology to subunits of complement factor C1q (1, 3). Adiponectin expression is reduced in obesity and type 2 diabetes, and plasma concentrations of adiponectin are inversely related to body weight and insulin concentrations (5–8). Treatment with adiponectin improves insulin sensitivity in mouse models of insulin resistance (9, 10), and in adiponectin knockout mice, adiponectin substitution can reverse diet-induced insulin resistance (11). Adiponectin is also inversely associated with other traditional cardiovascular risk factors, such as blood pressure, heart rate, total cholesterol, LDL-cholesterol, and triglycerides (12, 13). In addition, recent studies suggest that it may have antiatherogenic and antiinflammatory properties (14–19). Adiponectin may therefore be an important blood biomarker to assess in large-scale epidemiologic studies of several chronic diseases.

To gain a reliable risk estimate with a single blood measurement, the within-person variability over time should be small compared with the between-person variability (20). In addition, the stability of a valid biological marker should not be substantially affected by length of storage or temperature (21–25). Ideally, serum or plasma from whole blood should be separated immediately and stored in deep freeze. In large epidemiologic studies, however, blood specimens are often collected at different times and locations and transported on ice over several hours or days to central laboratories for processing and storage.

The aims of the present study were to evaluate the stability of human adiponectin concentrations in blood specimens collected and stored on ice packs for up to 36 h before processing and to assess the reproducibility of human adiponectin concentrations over a period of 1 year.

The stability of adiponectin was assessed from samples collected in EDTA (6 male and 6 female volunteers) and sodium-heparin (12 female volunteers) Vacutainers, both after a 12-h overnight fast. The samples were collected in three 10-mL Vacutainers and stored with ice packs in Styrofoam containers. This process emulated the condi-

tions we used to collect more than 60 000 blood samples mailed to our laboratory from cohort members of the Health Professionals Follow-up Study (HPFS), the Nurses' Health Study, and the Nurses' Health Study II (25). Time to process was defined as 0, 24, and 36 h after venipuncture. Samples were centrifuged and aliquoted for storage in liquid nitrogen (–150 °C) at each of the three time points. Each sample was assigned a different identification number and was randomly placed in the analysis batch with respect to the three different processing time periods.

In a separate pilot study we randomly selected 300 men from the HPFS and collected two EDTA samples 1 year apart, using methods described elsewhere (25). From this pilot collection, we chose a subsample of 20 men to test the 1-year reproducibility of adiponectin. Similar to the stability study, each sample was assigned a different identification number and was randomly placed in the analysis batch with respect to the date of blood collection. In the main HPFS, information about health and disease status is assessed biennially by a self-administered questionnaire, starting in 1986 (26). All participants gave written informed consent, and the study was approved by the Harvard School of Public Health Human Subjects Committee Review Board.

Plasma adiponectin was measured by competitive RIA using a commercial reagent set (Linco Research Inc.), utilizing a highly purified antibody raised against recombinant human adiponectin. The samples were analyzed in duplicate, with one reagent set each for the EDTA stability samples, the sodium-heparin stability samples, and the EDTA reproducibility samples. We included additional samples to assess the intraassay variation and found CVs of 16% (n = 4) for the EDTA stability samples, 26% (n = 6) for the sodium-heparin stability samples, and 20% (n = 2) for the reproducibility samples.

Adiponectin values were ln-transformed to improve the normality of the distribution and are presented as geometric means and 95% confidence intervals (CIs). The Student paired *t*-test of geometric means was used to compare the adiponectin concentrations measured at different time-to-process periods and to compare the concentrations in 2000 and 2001. Intraclass correlation coefficients were calculated by ANOVA to assess the stability of adiponectin over time and to assess the reproducibility from the year 2000 to 2001 (20). To account for changes in body weight over time, we adjusted our reproducibility analysis for body mass index (BMI), calculated as the ratio of body weight (reported in pounds in the HPFS questionnaire in the years 2000 and 2002) to body height (reported to the closest inch) squared and expressed as kg/m<sup>2</sup>, using analysis of covariance. Changes in BMI were tested by the Student paired *t*-test. Pearson correlation coefficients and partial correlation coefficients were calculated to assess the relationship between BMI, age, and adiponectin concentrations. All analyses were conducted with SAS 6.12 (SAS Institute Inc.). All *P* values presented are two-sided, and *P* values <5% were considered statistically significant.

**Table 1. Adiponectin concentrations in samples processed 0, 24, and 36 h after blood collection in EDTA and sodium heparin.**

|                   | EDTA samples<br>(n = 12) |             |                | Sodium-heparin samples<br>(n = 12) |             |                |
|-------------------|--------------------------|-------------|----------------|------------------------------------|-------------|----------------|
|                   | Geometric mean           | 95% CI      | P <sup>a</sup> | Geometric mean                     | 95% CI      | P <sup>a</sup> |
| Adiponectin, mg/L |                          |             |                |                                    |             |                |
| 0 h               | 13.07                    | 9.17–18.61  |                | 13.70                              | 10.67–17.59 |                |
| 24 h              | 13.11                    | 9.94–17.28  | 0.96           | 14.33                              | 11.34–18.11 | 0.44           |
| 36 h              | 15.70                    | 11.37–21.67 | 0.05           | 13.87                              | 11.00–17.49 | 0.85           |

<sup>a</sup> Compared with adiponectin concentrations at 0 h (paired t-test of geometric means).

We found that in the sodium-heparin samples, adiponectin concentrations were not significantly different in those specimens analyzed after 24 or 36 h compared with those which were processed immediately (Table 1). In the EDTA samples, plasma concentrations were similar 0 and 24 h after blood collection but slightly increased after 36 h ( $P = 0.05$ ). The overall intraclass correlation coefficients of the samples processed at 0, 24, and 36 h after blood collection were 0.85 (95% CI, 0.67–0.95) in the EDTA blood samples and 0.85 (0.67–0.95) in the sodium-heparin samples. The intraclass correlations for separate time intervals (0–24, 0–36, and 24–36 h) were in similar ranges (data not shown). Stratified by gender, adiponectin concentrations in the EDTA samples did not change significantly over 36 h (data not shown), and the overall intraclass correlation coefficient was 0.46 (–0.03 to 0.88) in men and 0.71 (0.27–0.95) in women.

Adiponectin concentrations decreased over a period of 1 year, from 17.90 (14.39–22.70) to 15.86 (13.02–19.33) mg/L ( $P = 0.03$ ); however, this was somewhat accounted for by changes in BMI. After adjustment for BMI, there was no significant difference ( $P = 0.09$ ) between adiponectin concentrations obtained in the years 2000 [17.64 (14.71–21.15) mg/L] and 2001 [16.10 (13.42–19.30) mg/L]. Furthermore, the two measurements were highly correlated (intraclass correlation coefficient, 0.85; 95% CI, 0.66–0.94; BMI-adjusted, 0.84; 95% CI, 0.65–0.94). Mean BMI increased from  $25.5 \pm 2.8$  to  $25.9 \pm 3.2$  kg/m<sup>2</sup> ( $P = 0.13$ ). There were significant inverse associations between the adiponectin concentrations in 2000 and 2001 and BMI in 2000 and 2002 ( $r = -0.47$ ;  $P = 0.04$  and  $r = -0.45$ ;  $P = 0.04$ , respectively). After adjustment for age, these correlations became slightly stronger ( $r = -0.54$ ;  $P = 0.02$ , and  $r = -0.48$ ;  $P = 0.04$ , respectively). Age itself was not significantly related to the adiponectin concentrations ( $r = 0.23$ ;  $P = 0.33$  for 2000 and  $r = 0.14$ ;  $P = 0.55$  for 2001). The mean age of our sample was 59 years (range, 53–65 years).

A multitude of factors potentially affects the assessment of biological markers, leading to imprecision of results. Storage time and temperature are important factors that may affect assay stability of blood and may bias results in either direction. Therefore, documentation of specimen stability in typical study conditions is essential in large-scale epidemiologic studies. Furthermore, a single assessment of a biochemical indicator may be susceptible to short-term variation and not reflect true long-term expo-

sure. Random measurement error generally tends to decrease correlation and regression coefficients in epidemiologic studies toward 0 and bias relative risks toward 1. In our study, despite considerably high intraassay CVs, we found intraclass correlation coefficients for adiponectin of ~0.85, indicating excellent reproducibility (20). Assuming true relative risks between adiponectin and chronic diseases of 1.5, 2.0, and 2.5, an intraclass correlation coefficient of this magnitude would lead to observed relative risks [ $RR_{\text{observed}} = \exp(\ln RR_{\text{true}} \times r_{\text{intraclass}})$ ] of 1.4, 1.8, and 2.2 (27), indicating only a modest risk reduction. Furthermore, our results may be an underestimate of the true intraclass correlation coefficient, as more precise laboratory methods to determine adiponectin concentrations become available. Our study indicates that packing and transporting adiponectin blood samples on ice for up to 36 h is unlikely to produce any systematic error, although adiponectin concentrations were slightly increased 36 h after blood collection in the EDTA samples. We speculate whether the dissociation of adiponectin from polymeric to monomeric forms might be a reason for this observation (28). However, this finding may also be attributable to chance because similar changes were not observed in the sodium-heparin samples.

In conclusion, we found that human adiponectin concentrations are stable in whole blood stored in EDTA or sodium-heparin Vacutainers when placed on ice packs and stored in Styrofoam containers for up to 36 h. Furthermore, after accounting for changes in BMI, individual blood adiponectin concentrations did not significantly change over a period of 1 year but showed a high degree of reproducibility. These findings suggest that a single adiponectin measurement may be sufficient for risk assessment in epidemiologic studies. Other possible factors affecting the stability and reproducibility of adiponectin, such as long-term storage, temperature, and repeated freeze-thaw cycles, should also be considered (29–32).

We would like to thank Drs. Qiang Tong and Gary Bradwin for their expert advice provided on this project, Alan Paciorek and Guo Tan for their competent technical laboratory assistance, and Lydia Liu for helpful statistical advice and programming review. This study was supported by research grants HL35464 and CA55075.

Dr. Pischon was supported by a grant from the German Academic Exchange Service (DAAD).

## References

- Scherer PE, Williams S, Fogliano M, Baldini G, Lodish HF. A novel serum protein similar to C1q, produced exclusively in adipocytes. *J Biol Chem* 1995;270:26746–9.
- Maeda K, Okubo K, Shimomura I, Funahashi T, Matsuzawa Y, Matsubara K. cDNA cloning and expression of a novel adipose specific collagen-like factor, apM1 (AdiPose Most abundant Gene transcript 1). *Biochem Biophys Res Commun* 1996;221:286–9.
- Hu E, Liang P, Spiegelman BM. AdipoQ is a novel adipose-specific gene dysregulated in obesity. *J Biol Chem* 1996;271:10697–703.
- Nakano Y, Tobe T, Choi-Miura NH, Mazda T, Tomita M. Isolation and characterization of GBP28, a novel gelatin-binding protein purified from human plasma. *J Biochem (Tokyo)* 1996;120:803–12.
- Hotta K, Funahashi T, Arita Y, Takahashi M, Matsuda M, Okamoto Y, et al. Plasma concentrations of a novel, adipose-specific protein, adiponectin, in type 2 diabetic patients. *Arterioscler Thromb Vasc Biol* 2000;20:1595–9.
- Halleux CM, Takahashi M, Delporte ML, Detry R, Funahashi T, Matsuzawa Y, et al. Secretion of adiponectin and regulation of apM1 gene expression in human visceral adipose tissue. *Biochem Biophys Res Commun* 2001;288:1102–7.
- Weyer C, Funahashi T, Tanaka S, Hotta K, Matsuzawa Y, Pratley RE, et al. Hypoadiponectinemia in obesity and type 2 diabetes: close association with insulin resistance and hyperinsulinemia. *J Clin Endocrinol Metab* 2001;86:1930–5.
- Lindsay RS, Funahashi T, Hanson RL, Matsuzawa Y, Tanaka S, Tataranni PA, et al. Adiponectin and development of type 2 diabetes in the Pima Indian population. *Lancet* 2002;360:57–8.
- Yamauchi T, Kamon J, Waki H, Terauchi Y, Kubota N, Hara K, et al. The fat-derived hormone adiponectin reverses insulin resistance associated with both lipodystrophy and obesity. *Nat Med* 2001;7:941–6.
- Berg AH, Combs TP, Du X, Brownlee M, Scherer PE. The adipocyte-secreted protein Acrp30 enhances hepatic insulin action. *Nat Med* 2001;7:947–53.
- Maeda N, Shimomura I, Kishida K, Nishizawa H, Matsuda M, Nagaretani H, et al. Diet-induced insulin resistance in mice lacking adiponectin/ACRP30. *Nat Med* 2002;8:731–7.
- Matsubara M, Maruoka S, Katayose S. Decreased plasma adiponectin concentrations in women with dyslipidemia. *J Clin Endocrinol Metab* 2002;87:2764–9.
- Kazumi T, Kawaguchi A, Sakai K, Hirano T, Yoshino G. Young men with high-normal blood pressure have lower serum adiponectin, smaller LDL size, and higher elevated heart rate than those with optimal blood pressure. *Diabetes Care* 2002;25:971–6.
- Kubota N, Terauchi Y, Yamauchi T, Kubota T, Moroi M, Matsui J, et al. Disruption of adiponectin causes insulin resistance and neointimal formation. *J Biol Chem* 2002;277:25863–6.
- Ouchi N, Kihara S, Arita Y, Maeda K, Kuriyama H, Okamoto Y, et al. Novel modulator for endothelial adhesion molecules: adipocyte-derived plasma protein adiponectin. *Circulation* 1999;100:2473–6.
- Yokota T, Oritani K, Takahashi I, Ishikawa J, Matsuyama A, Ouchi N, et al. Adiponectin, a new member of the family of soluble defense collagens, negatively regulates the growth of myelomonocytic progenitors and the functions of macrophages. *Blood* 2000;96:1723–32.
- Ouchi N, Kihara S, Arita Y, Okamoto Y, Maeda K, Kuriyama H, et al. Adiponectin, an adipocyte-derived plasma protein, inhibits endothelial NF- $\kappa$ B signaling through a cAMP-dependent pathway. *Circulation* 2000;102:1296–301.
- Ouchi N, Kihara S, Arita Y, Nishida M, Matsuyama A, Okamoto Y, et al. Adipocyte-derived plasma protein, adiponectin, suppresses lipid accumulation and class A scavenger receptor expression in human monocyte-derived macrophages. *Circulation* 2001;103:1057–63.
- Arita Y, Kihara S, Ouchi N, Maeda K, Kuriyama H, Okamoto Y, et al. Adipocyte-derived plasma protein adiponectin acts as a platelet-derived growth factor-BB-binding protein and regulates growth factor-induced common postreceptor signal in vascular smooth muscle cell. *Circulation* 2002;105:2893–8.
- Fleiss JL. Reliability of measurement. In: Fleiss JL, ed. *The design and analysis of clinical experiments*. New York: Wiley and Sons, 1986:1–32.
- Laessig RH, Pauls FP, Schwartz TA. Long term preservation of serum specimens collected in the field for epidemiological studies of biochemical parameters. *Health Lab Sci* 1972;9:16–23.
- Williams GZ, Harris EK, Widdowson GM. Comparison of estimates of long-term analytical variation derived from subject samples and control serum. *Clin Chem* 1977;23:100–4.
- Evans RW, Sankey SS, Hauth BA, Sutton-Tyrrell K, Kamboh MI, Kuller LH. Effect of sample storage on quantitation of lipoprotein(a) by an enzyme-linked immunosorbent assay. *Lipids* 1996;31:1197–203.
- Ferrari R, Ceconi C, Signorini C, Anand I, Harris P, Albertini A. Sample treatment for long-distance transport of plasma for hormone assay. *Clin Chem* 1989;35:331–2.
- Hankinson SE, Manson JE, London SJ, Willett WC, Speizer FE. Laboratory reproducibility of endogenous hormone levels in postmenopausal women. *Cancer Epidemiol Biomarkers Prev* 1994;3:51–6.
- Rimm EB, Giovannucci EL, Willett WC, Colditz GA, Ascherio A, Rosner B, et al. Prospective study of alcohol consumption and risk of coronary disease in men. *Lancet* 1991;338:464–8.
- Rosner B, Willett WC, Spiegelman D. Correction of logistic regression relative risk estimates and confidence intervals for systematic within-person measurement error. *Stat Med* 1989;8:1051–69 (discussion 1071–3).
- Arita Y, Kihara S, Ouchi N, Takahashi M, Maeda K, Miyagawa J, et al. Paradoxical decrease of an adipose-specific protein, adiponectin, in obesity. *Biochem Biophys Res Commun* 1999;257:79–83.
- Bauman JE. Stability of radioimmunoassayable steroid and protein hormones after repeated freeze-thaw cycles. *Clin Chem* 1982;28:2336–7.
- Kubasik NP, Ricotta M, Hunter T, Sine HE. Effect of duration and temperature of storage on serum analyte stability: examination of 14 selected radioimmunoassay procedures. *Clin Chem* 1982;28:164–5.
- Diver MJ, Hughes JG, Hutton JL, West CR, Hipkin LJ. The long-term stability in whole blood of 14 commonly-requested hormone analytes. *Ann Clin Biochem* 1994;31:561–5.
- Spate MP, Burks MF, Evans PS, Tumbleson ME. Concentrations and activities of bovine serum biochemic constituents as a function of storage time and temperature. *Clin Biochem* 1970;3:137–49.

**High Stability of Markers of Cardiovascular Risk in Blood Samples, Erik J. Giltay,<sup>1\*</sup> Johanna M. Geleijnse,<sup>1</sup> Evert G. Schouten,<sup>1</sup> Martijn B. Katan,<sup>2</sup> and Daan Kromhout<sup>3</sup>** (<sup>1</sup> Division of Human Nutrition & Epidemiology, Wageningen University, 6700 EV Wageningen, The Netherlands; <sup>2</sup> Wageningen Center for Food Sciences (M.B.K.), 6700 AN Wageningen, The Netherlands; <sup>3</sup> National Institute of Public Health and the Environment, 3720 BA Bilthoven, The Netherlands; \* address correspondence to this author at: Division of Human Nutrition and Epidemiology, Wageningen University, PO Box 8129, 6700 EV Wageningen, The Netherlands; fax 31-317-483342, e-mail giltay@dds.nl)

Biomarkers representing long-term risk of coronary heart disease are widely used in epidemiologic research. Procedures for blood sampling and processing need to be efficient and cost-effective to enable large sample sizes for greater statistical power and precision. Transfer of blood samples by mail is less expensive, easier to perform, and less time-consuming than fast courier services or asking patients to attend a central laboratory for blood sampling. This approach may be incorporated into routine practice and may reduce the likelihood of missing data and random error (1, 2) and eliminate intercenter variability. Although the stabilities of many analytes at different temperatures and different time intervals have been reported (3–7) and some studies have mimicked transportation conditions (2, 8), to our knowledge neither the effects of transfer by a next-working-day mail service nor the effects on the fatty acid (FA) composition are known. We therefore investigated the variability and reliability of risk factors for coronary heart disease in blood samples delivered by a next-working-day mail service, which is available within most Western countries.

We studied 20 healthy volunteers (7 men and 13
